# Supplementary material for: Fabrication of flexible and robust CdS composite photonic crystal films through melt-compression
Source: Royal Society of Chemistry journal article supplement (doi:10.1039/d4tc00345d), 2024-01-01
Supplement: d4tc00345d1.pdf [file d4tc00345d1.pdf]

## Supporting Information

### Fabrication of flexible and robust CdS composite photonic crystal films through melt-compression

Chengcai Wu<sup>a</sup>, Qian Yao Fang<sup>a</sup>, Jiahao Li<sup>a</sup> and Xin Su<sup>\*a</sup>

*School of Material Science and Chemical Engineering, Ningbo University, Ningbo, Zhejiang, 315211, China.*

**Table S1.** Recipes for preparing monodisperse CdS spheres with various diameters

| Cd(NO <sub>3</sub> ) <sub>2</sub> ·4H <sub>2</sub> O (g) | TU (g) | PVP (g) | DEG (mL) | Diameter (nm) |
|----------------------------------------------------------|--------|---------|----------|---------------|
| 11.10                                                    | 2.74   | 5       | 360      | 130           |
| 11.72                                                    | 2.89   | 5       | 360      | 150           |
| 12.34                                                    | 3.04   | 5       | 360      | 170           |
| 12.96                                                    | 3.20   | 5       | 360      | 190           |

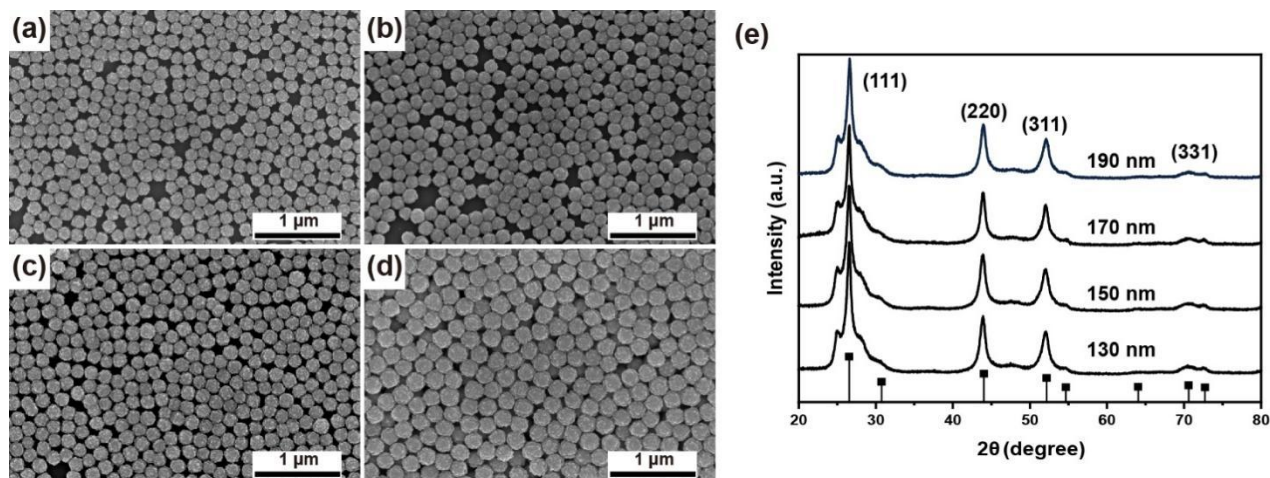

**Figure S1.** SEM images of monodisperse CdS spheres with different diameters: (a) 130 nm; (b) 150 nm; (c) 170 nm; (d) 190 nm; (e) XRD patterns of CdS spheres

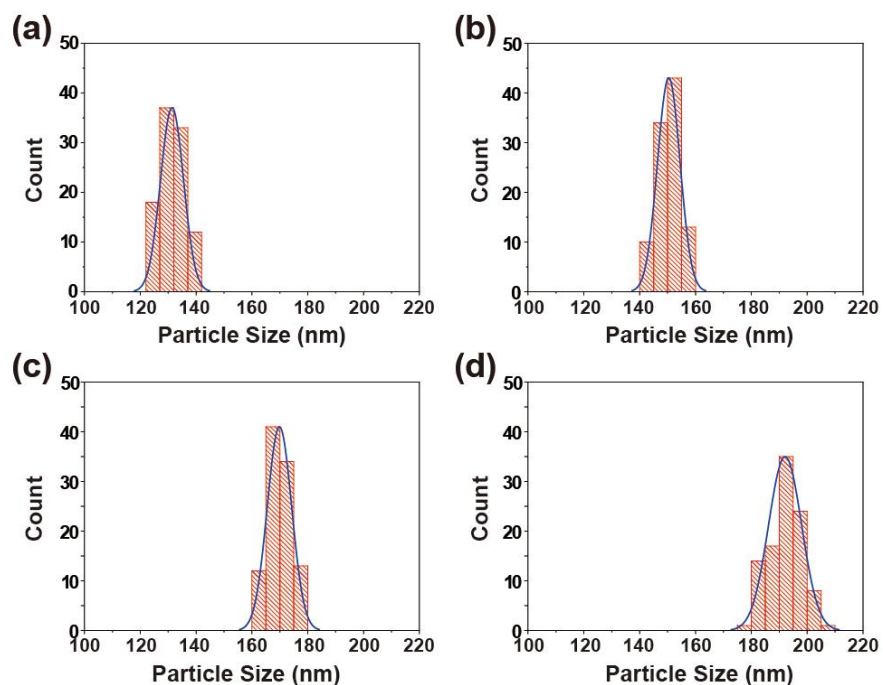

**Figure S2.** Size distribution of CdS spheres with various diameters: (a) 130 nm; (b) 150 nm; (c) 170 nm; (d) 190 nm;

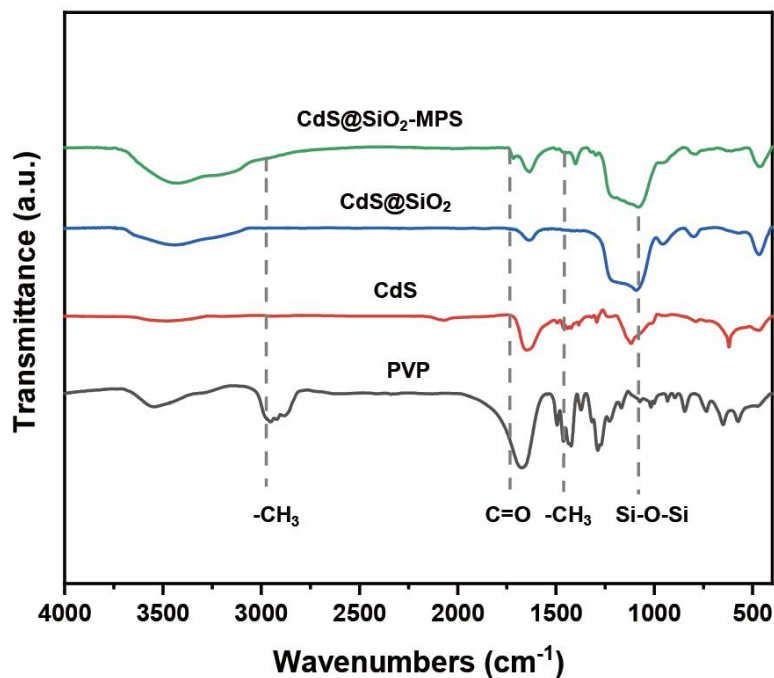

**Figure S3.** FTIR spectra of PVP, CdS spheres, CdS@SiO<sub>2</sub> spheres, CdS@SiO<sub>2</sub>-MPS spheres

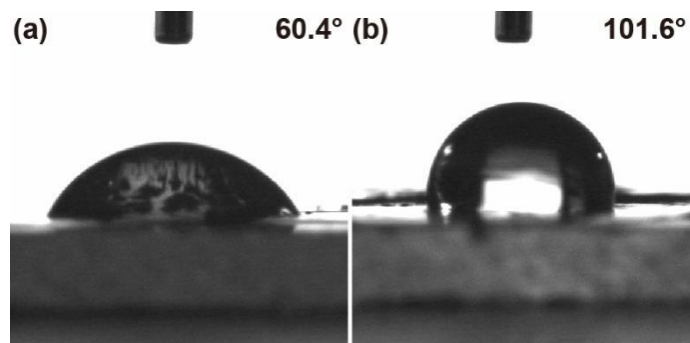

**Figure S4.** Optical images showing contact angles of water on the films of (a) CdS@SiO<sub>2</sub> spheres and (b) MPS-modified CdS@SiO<sub>2</sub> spheres

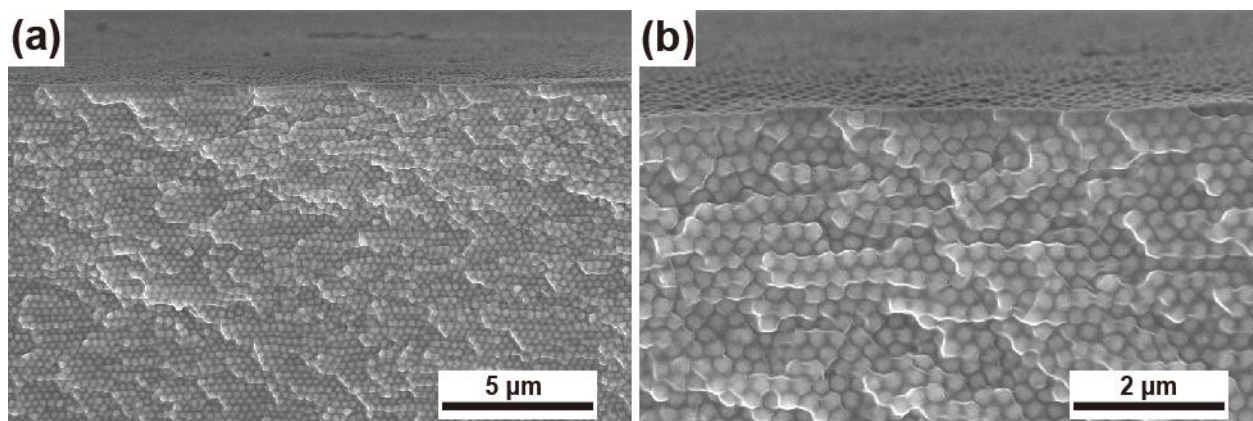

**Figure S5.** Cross-sectional SEM images near the surface of CdS/P(MMA-BA) composite PC films with different magnification times

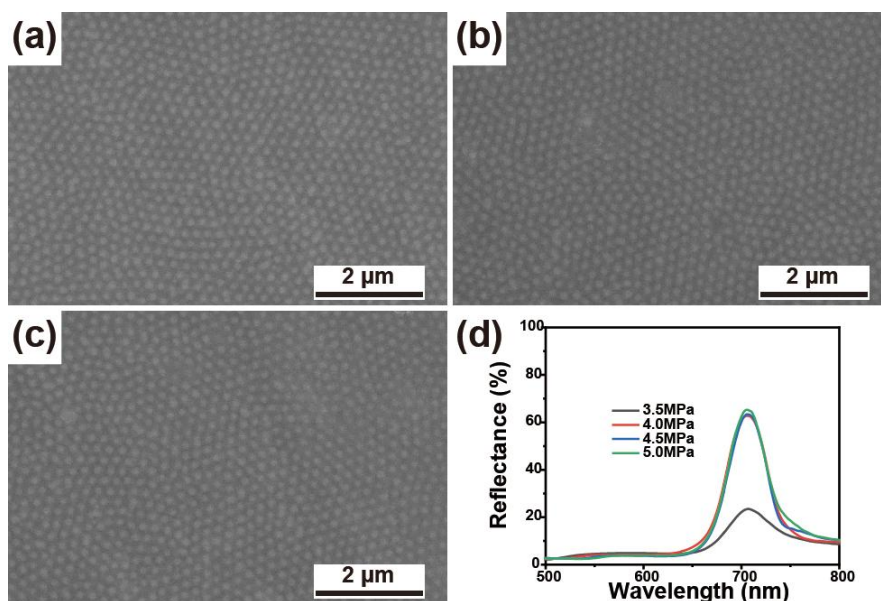

**Figure S6.** SEM images of composite PC films at various applied pressures using CdS@SiO<sub>2</sub>@P(MMA-BA) spheres with 25 nm polymer shell as building blocks: (a) 4.0 MPa; (b) 4.5 MPa; (c) 5.0 MPa; (d) reflectance spectra of corresponding films. The films were fabricated at 80 °C for 5 min.

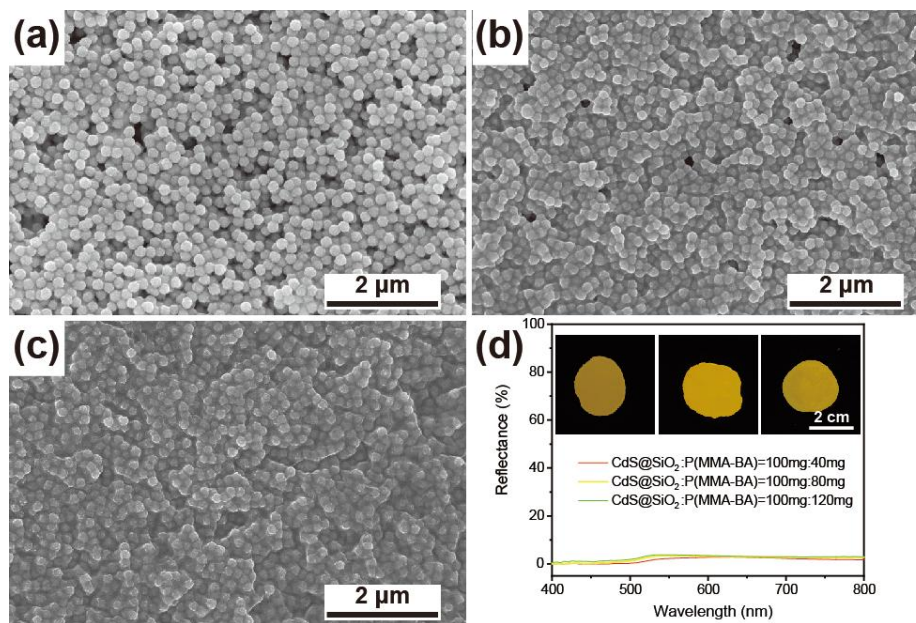

**Figure S7.** (a~c) SEM images of composite films from the mixture of CdS@SiO<sub>2</sub> spheres and P(MMA-BA) nanoparticles with different ratios; (d) reflectance spectrum of film a-c, the insets are the corresponding digital photographs.



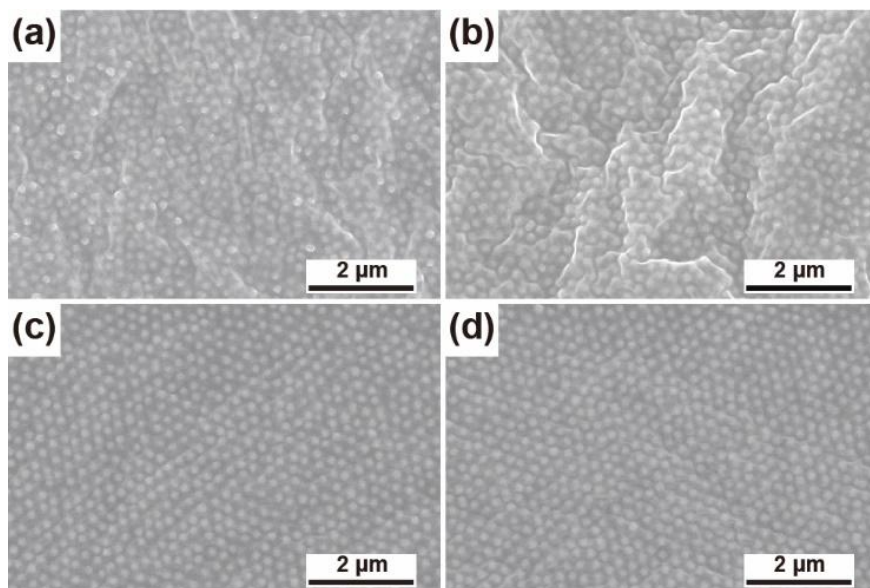

**Figure S8.** SEM images of compressed films at various conducting temperatures: (a) 60 °C; (b) 70 °C; (c) 80 °C; (d) 90 °C. The polymer shell thickness and applied pressure are 20 nm and 3.5 MPa, respectively.

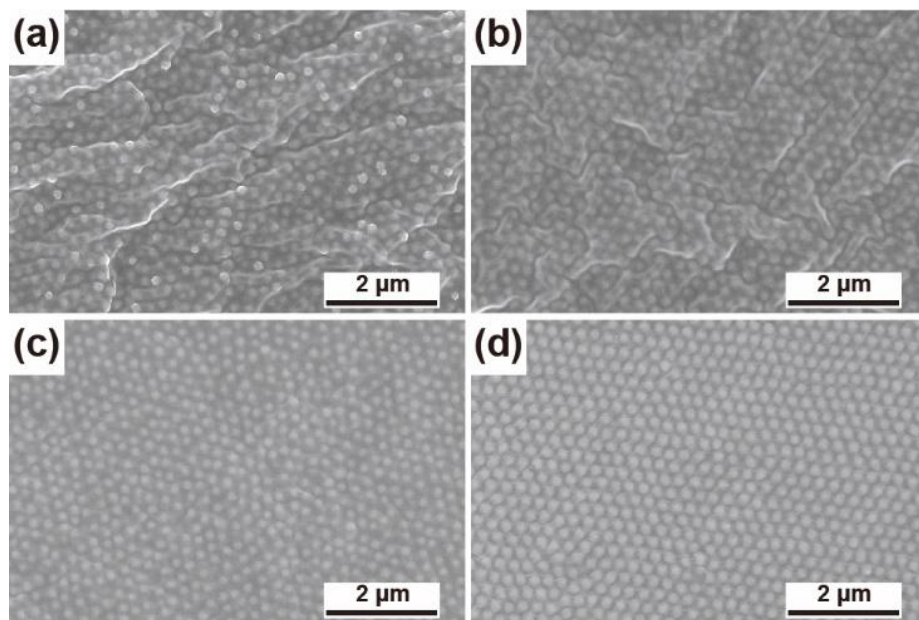

**Figure S9.** SEM images of compressed films at various applied pressures: (a) 0.5 MPa; (b) 1.5 MPa; (c) 2.5 MPa; (d) 3.5 MPa. The polymer shell thickness and conducting temperature are 20 nm and 80 °C, respectively.

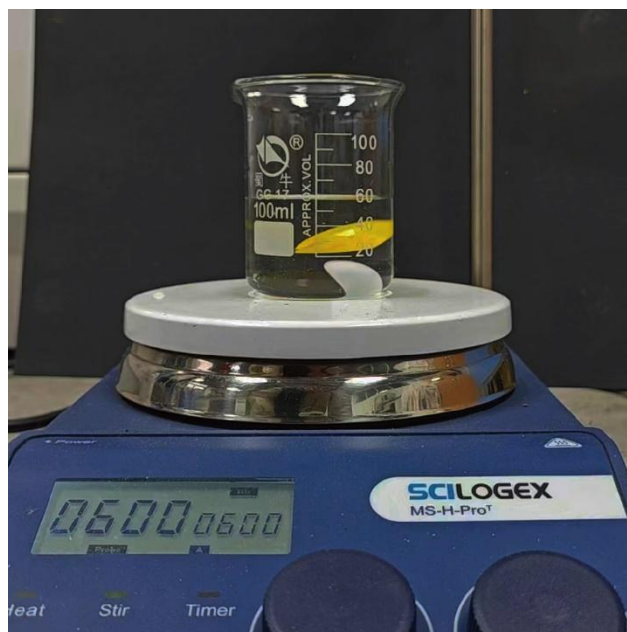

**Figure S10.** Equipment for the washing process test

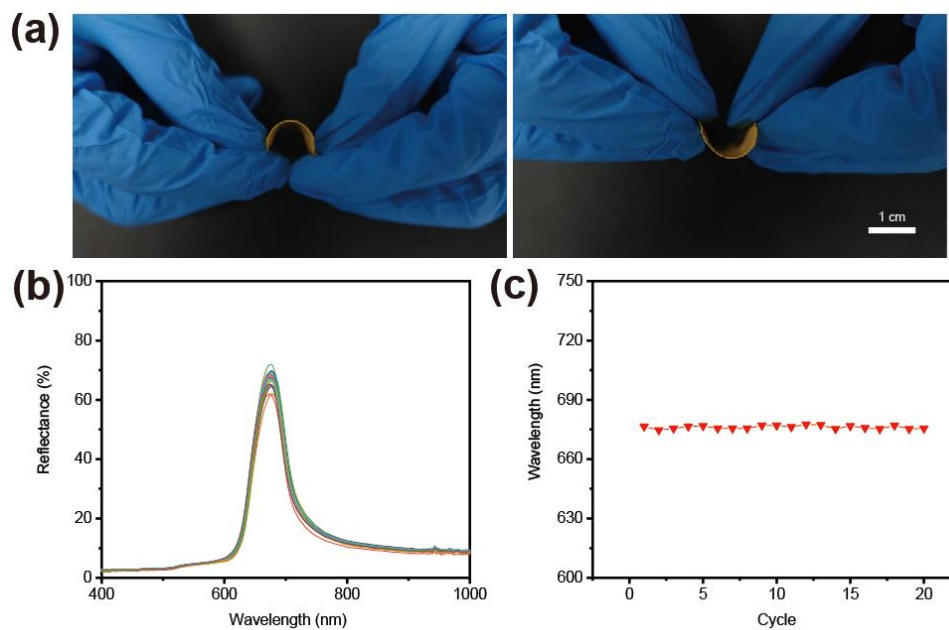

**Figure S11.** (a) Digital photographs demonstrating bending operations; (b) reflection spectra of the PC film after various cycles of bending; (c) peak positions of reflection spectra versus cycles

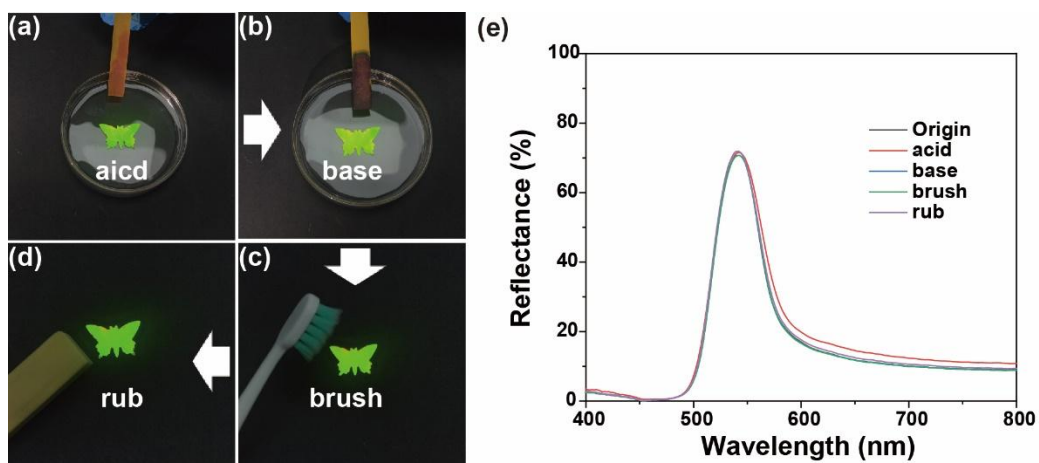

**Figure S12.** Digital photographs of a green butterfly-shaped composite film (a,b) soaked in acid solution (pH=2) and basic solution (pH=12) for 2 h; (c) brushed and (d) rubbed for 100 times; (e) reflectance spectra of the green film after certain treatment

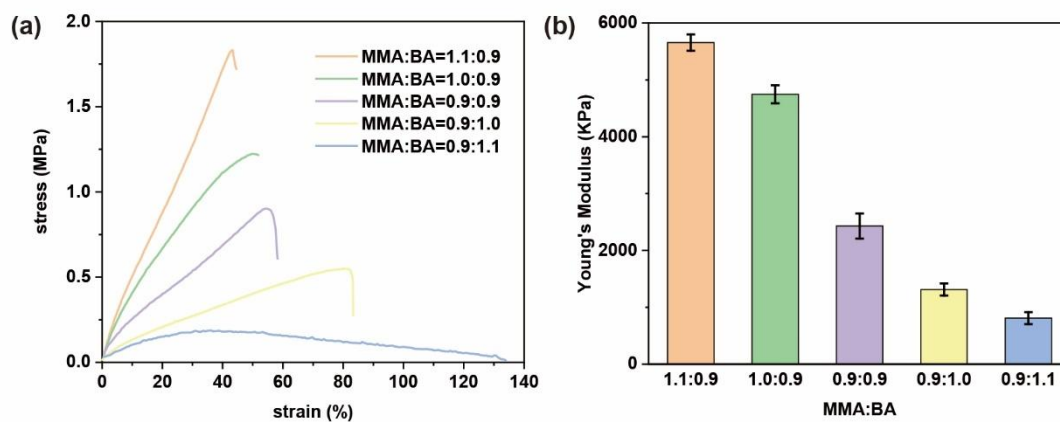

**Figure S13.** (a) Strain-stress curves and (b) Young's modulus of composite PC films with different polymer shell compositions;

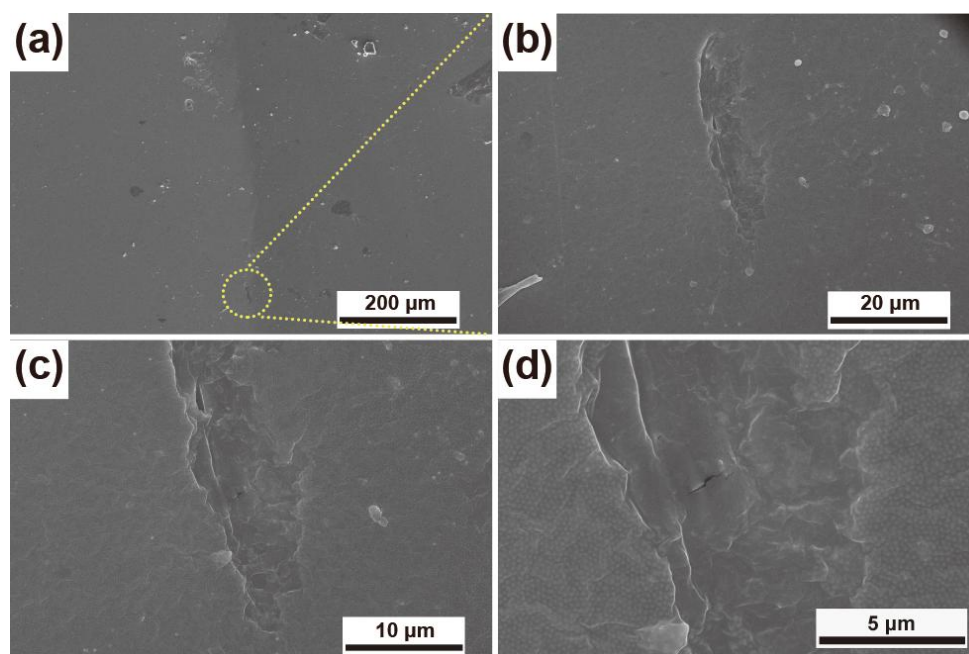

**Figure S14.** SEM images of the boundary of yellow and green pieces in a recombined pattern with different magnification times
